# Supplementary material for: Awareness of Dietary and Alcohol Guidelines Among Colorectal Cancer Survivors
Source: PubMed Central journal article supplement — Am J Prev Med. Author manuscript; Available in PMC 2018 Mar 2. (PMC5833984; doi:10.1016/j.amepre.2015.08.012), 2015-12

**Appendix Figure 1.** Colorectal cancer survivors' reported barriers and motivating beliefs regarding eating a healthy diet.

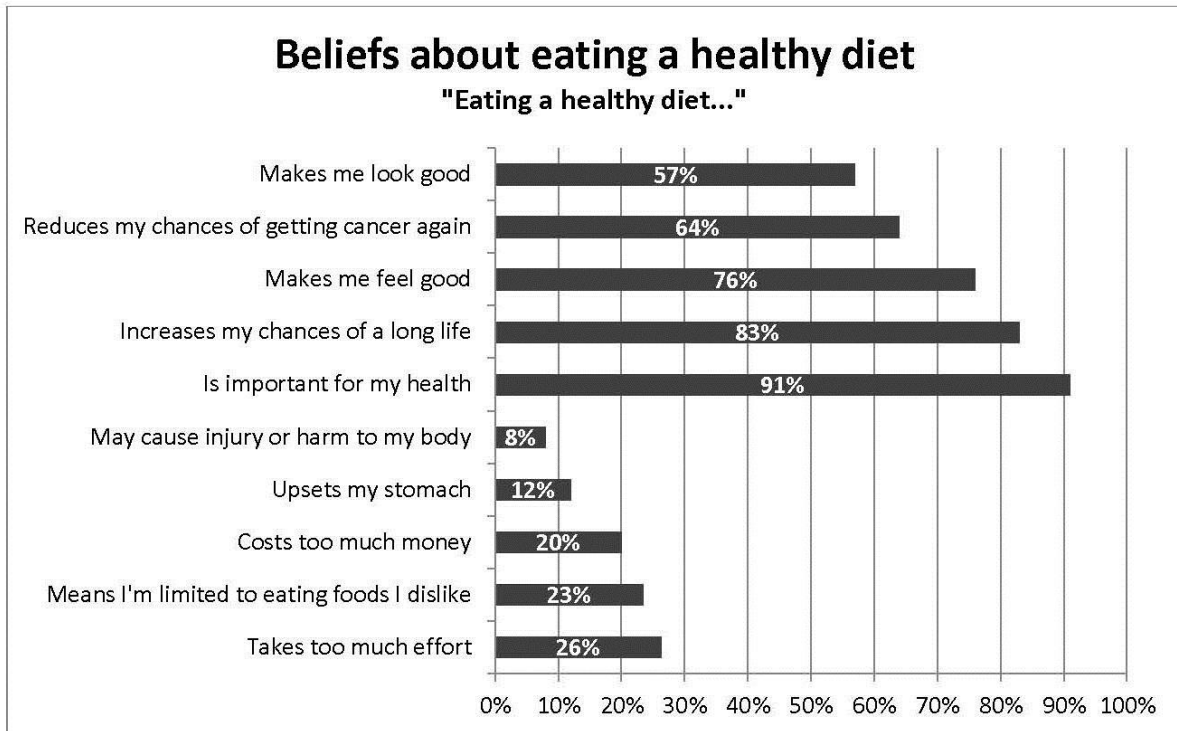

Supplement: NIHMS945853-supplement-Appendix.pdf [file NIHMS945853-supplement-Appendix.pdf]
